# Supplementary material
Source: PubMed Central journal article supplement (PMC9768099)
Supplement: 11357_2022_612_MOESM1_ESM.pdf [file 11357_2022_612_MOESM1_ESM.pdf]

**Supplemental Table 1: Patient recruitment and enrollment.**

|                                | Adults<br>(n=11) | Older<br>subjects<br>(n=11) |
|--------------------------------|------------------|-----------------------------|
| Average age (range), y         | 30 (24-36)       | 73 (67-83)                  |
| Gender, male/female (female %) | 4/7 (64)         | 5/6 (55)                    |
| Race, n                        |                  |                             |
| White (non-Hispanic)           | 9 (82%)          | 11 (100%)                   |
| White (Hispanic)               | 2 (18%)          |                             |
| Comorbidities, n               |                  |                             |
| None                           | 10 (91%)         | 2 (18%)                     |
| Arthritis                      | 1 (9%)           | 5 (45%)                     |
| Hypertension                   |                  | 5 (45%)                     |
| Stroke                         |                  | 1 (9%)                      |
| Heart disease                  |                  | 1 (9%)                      |
| Medications                    |                  |                             |
| Prescription                   | 1 (9%)           | 6 (55%)                     |
| Over-the-counter               | 5 (45%)          | 8 (73%)                     |

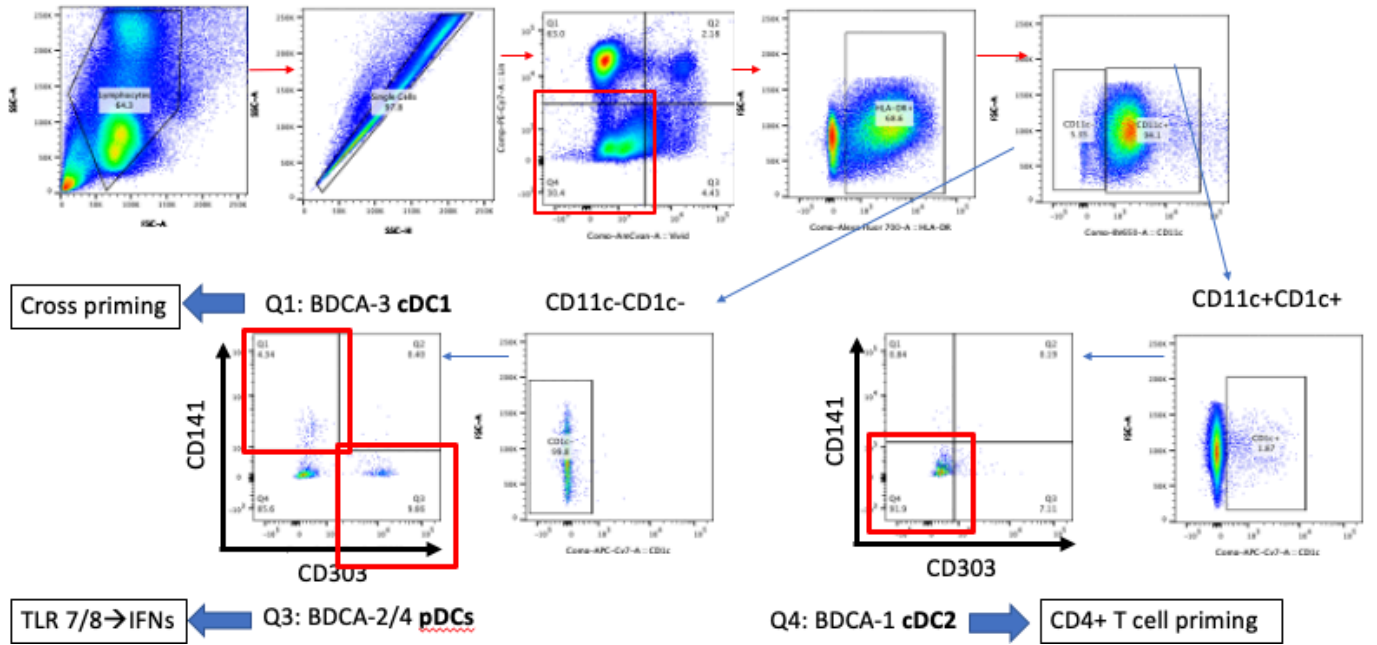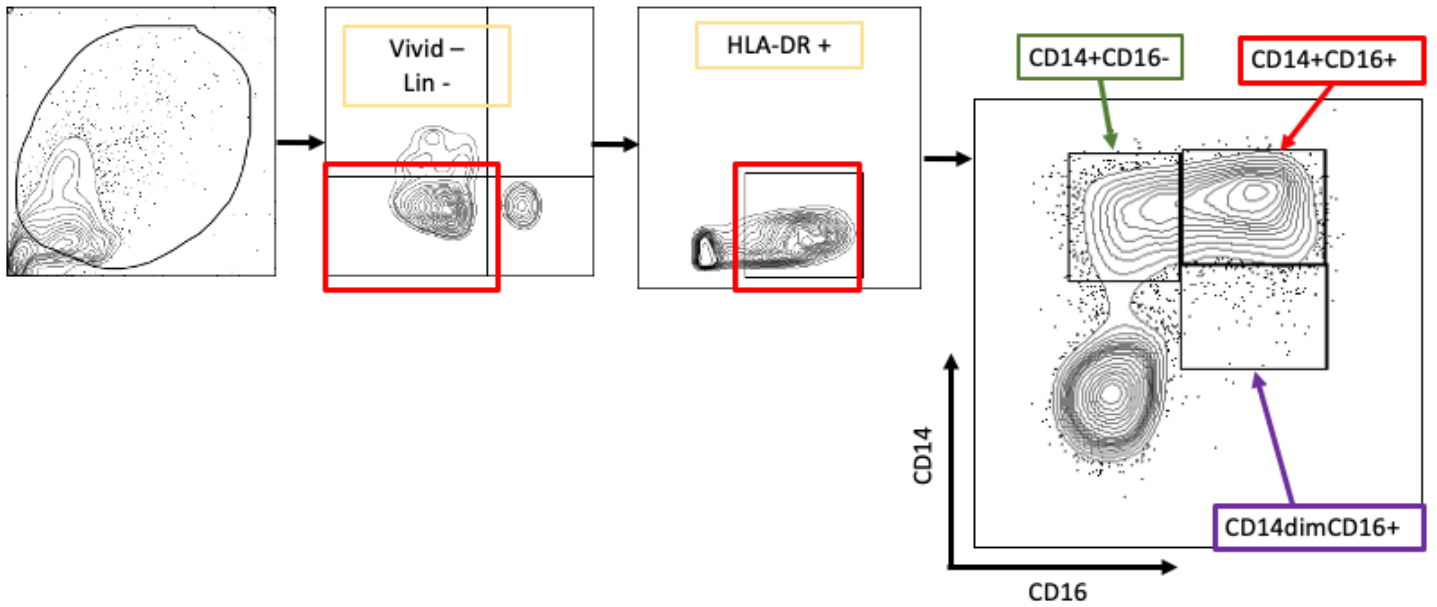

Supplemental fig 1 :Flow cytometry gating strategy

**Supplemental table 2: Flow cytometry antibody list**

| Antigen | Clone         | Fluorophore |
|---------|---------------|-------------|
| CD3     | HIT3 $\alpha$ | PE-Cy7      |
| CD56    | 5.1H11        | PE-Cy7      |
| CD19    | HIB19         | PE-Cy7      |
| CD20    | 2H7           | PE-Cy7      |
| CD11c   | BU15          | BV605       |
| CD14    | M5E2          | PE-Tx Red   |
| HLA-DR  | L243          | AF700       |
| CD16    | 3G8           | BV650       |
| CD1c    | L161          | APC-Cy7     |
| CD303   | 201A          | PerCP5.5    |
| pIRF7   | K47-671       | APC         |
| pTBK-1  | J133-587      | PE          |
| STING   | T3-680        | BV421       |
| CD141   | AD5-14H12     | FITC        |

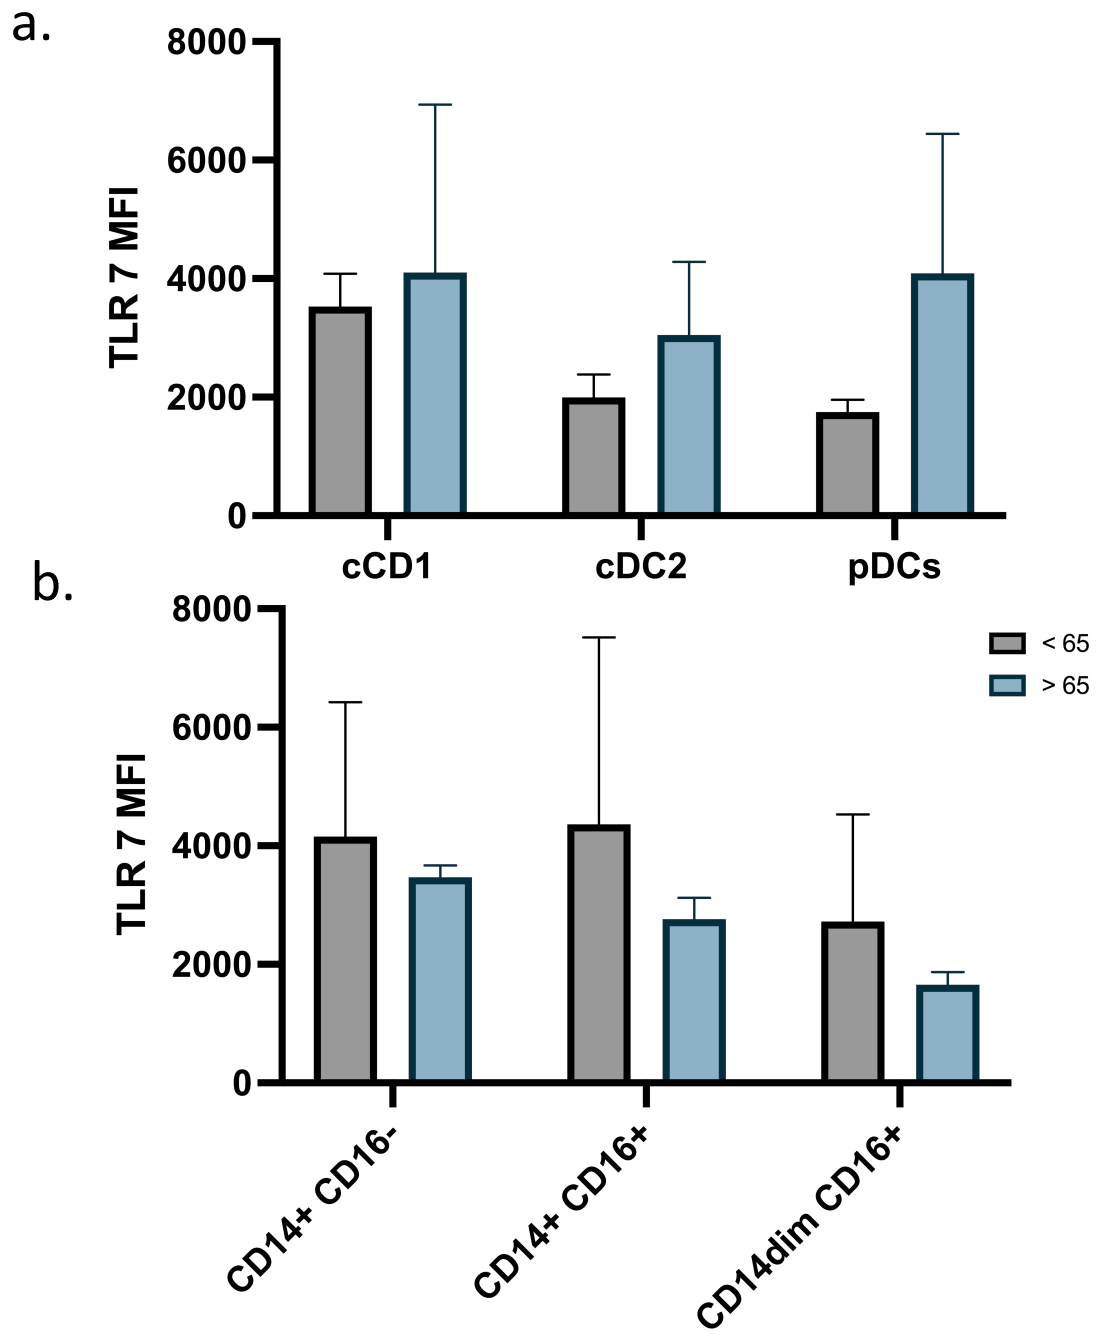

Supplemental fig 2 :TLR7 expression on surface of DC and monocyte subsets

**a.**

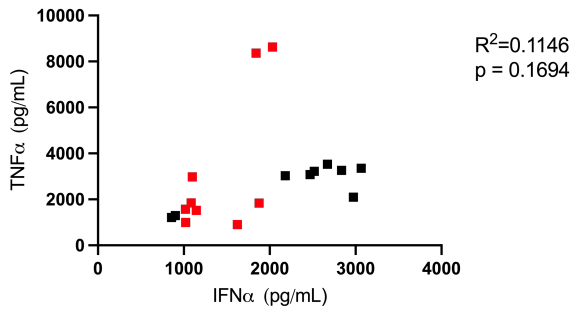

**b.**

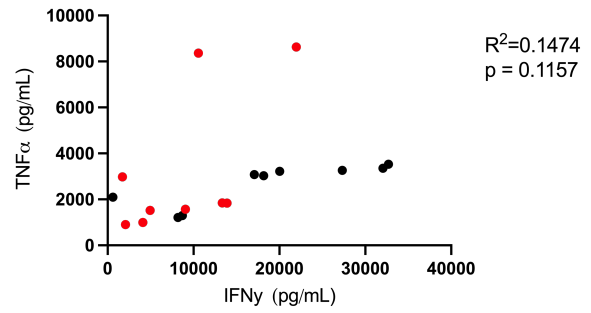

**c.**

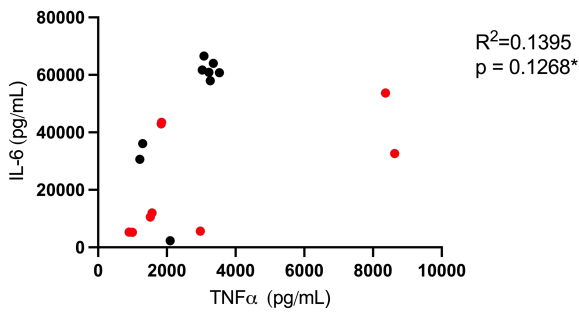

**d.**

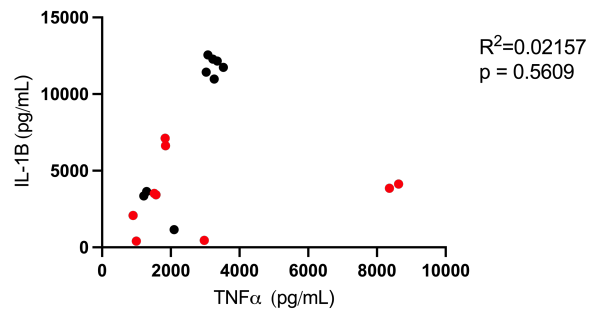

**Supplemental fig 3: Some cytokines were not significantly correlated independent of age**

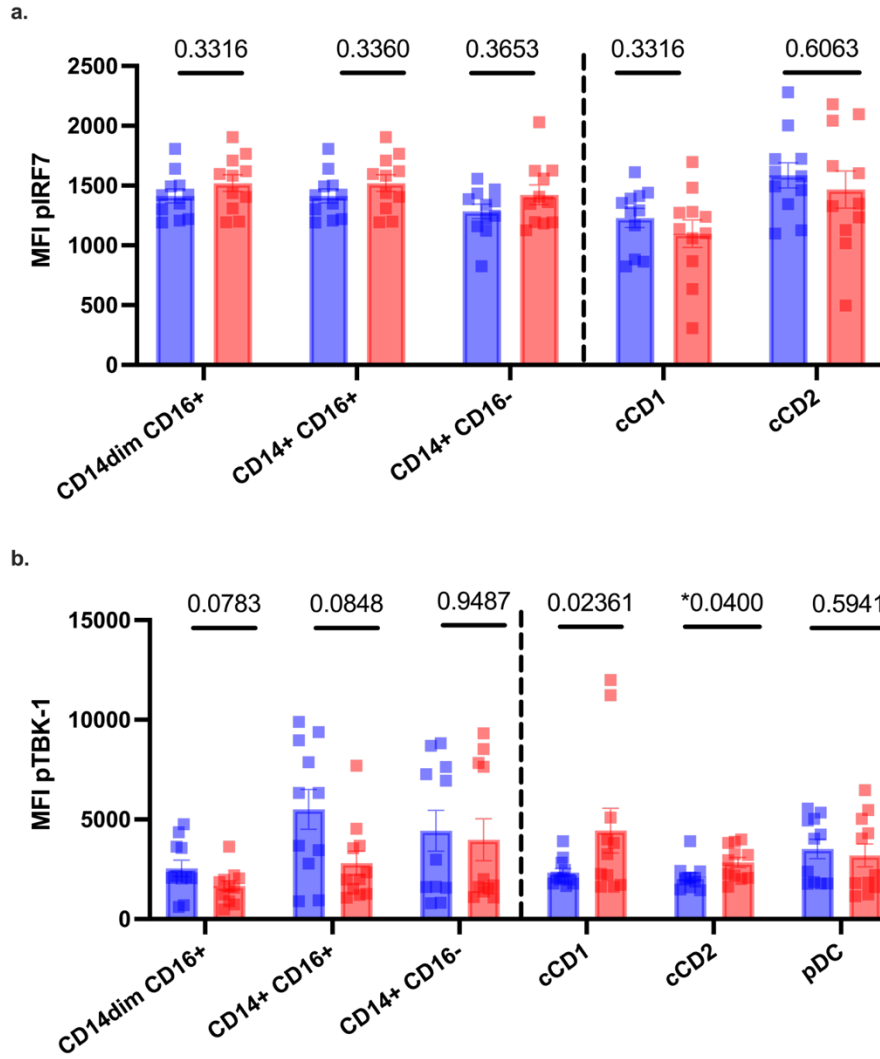

Supplemental fig 4: pIRF7 and pTBK-1 is not significantly different between age groups at baseline

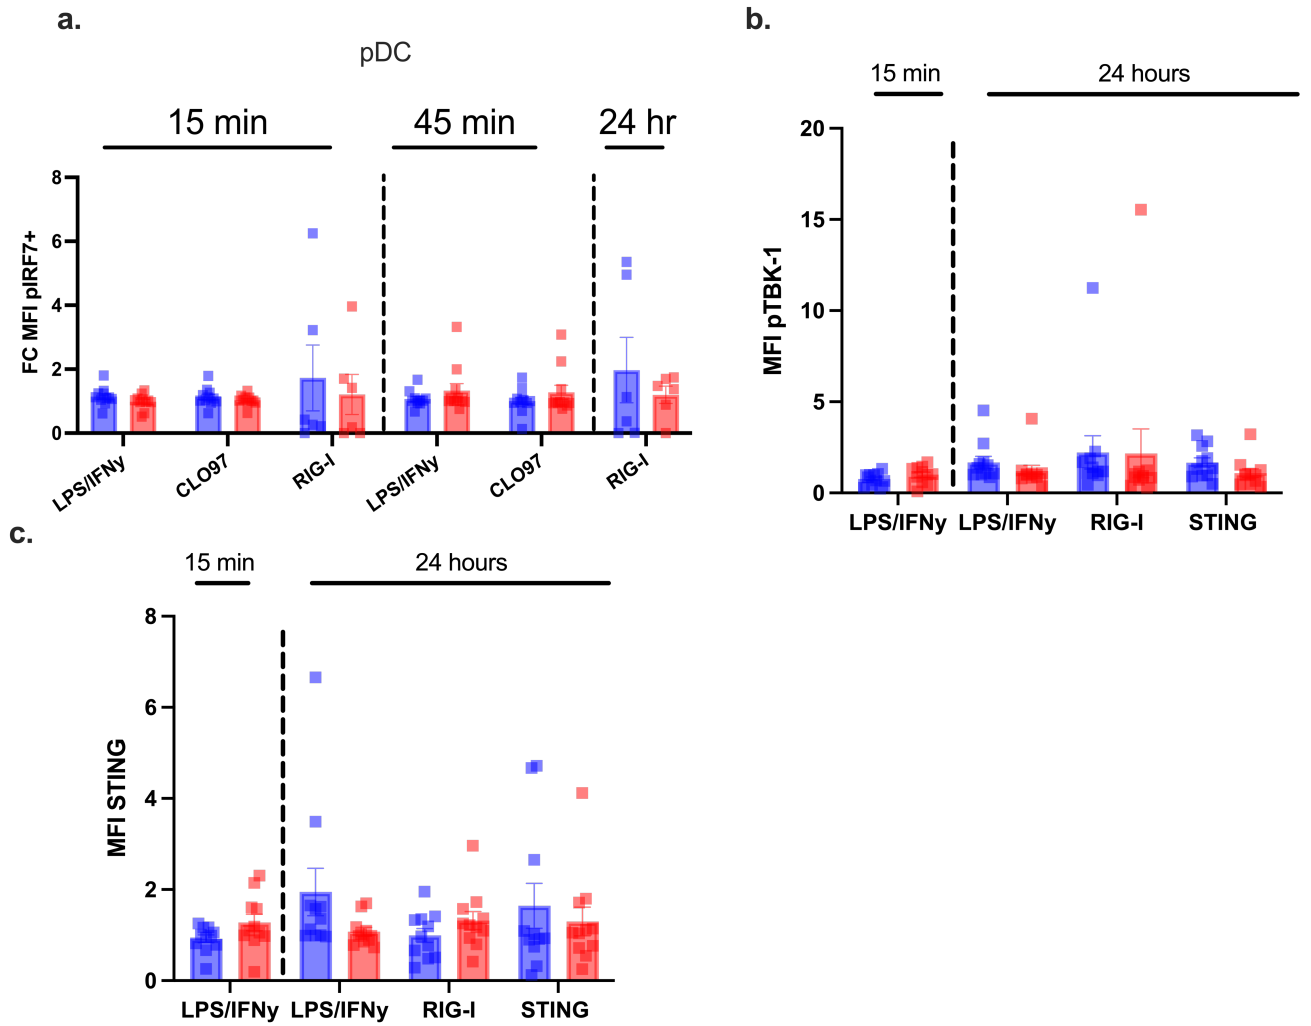

**Supplemental fig 5: Phosphorylation of IRF7 or TBK-1 was not significantly different in classical monocytes or pDCs.**

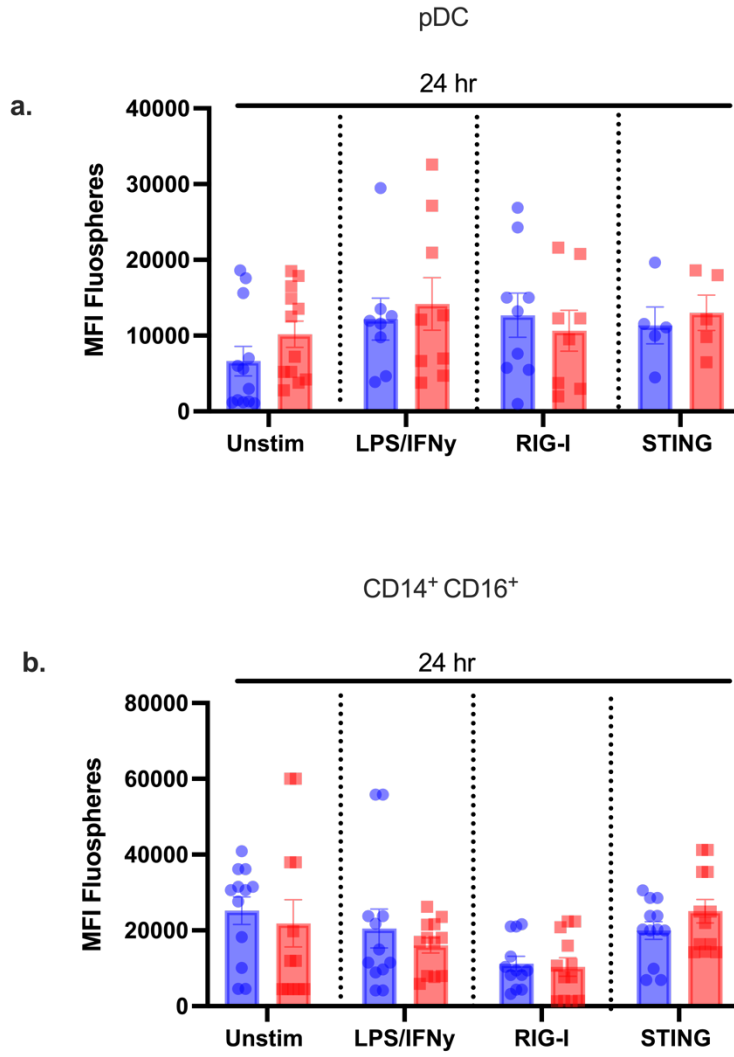

Supplemental fig 6 : Phagocytosis was not significantly different in pDCs or intermediate CD14<sup>+</sup> CD16<sup>+</sup> monocytes
